# Supplementary material for: GraphChrom: A Novel Graph-Based Framework for Cancer Classification Using Chromosomal Rearrangement Endpoints
Source: MDPI journal article supplement (doi:10.3390/cancers14133060), 2022-06-22
Supplement: s1 [file s1]

Figure S1. Number of aberrations for breast, central nervous system, hematopoietic and lymphoid tissue, liver, lung, ovary, pancreas, prostate, and skin reported on COSMIC

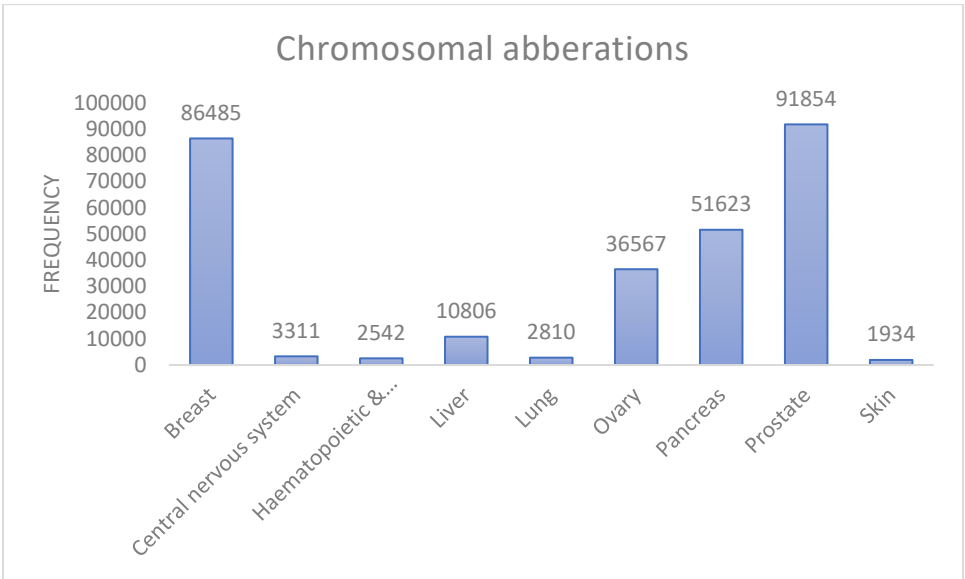

Figure S2. Size of the training data for inter, intra, and integrated chromosomal aberrations for breast, prostate, and pancreas cancers (number of graphs generated by GraphChrom)

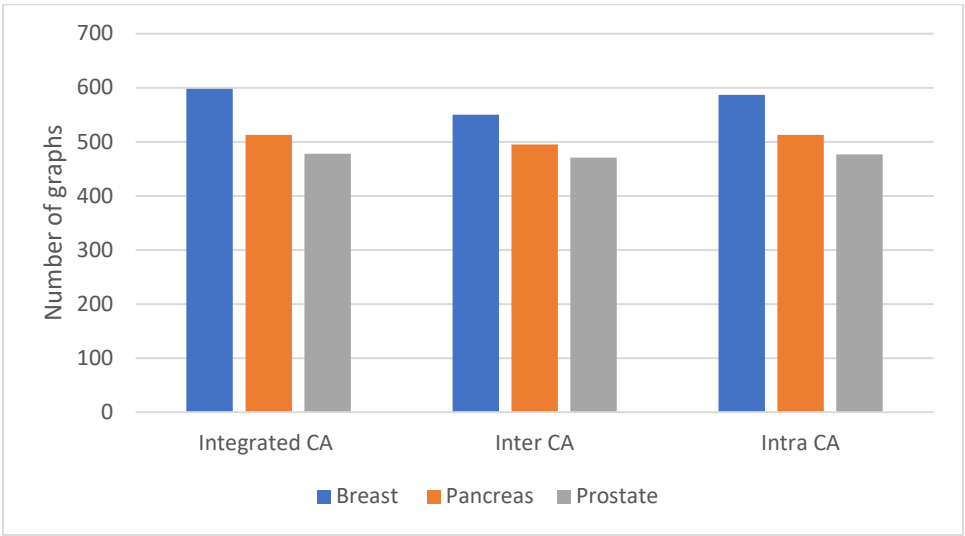

Figure S3. Frequency of chromosomal rearrangement per cancer type

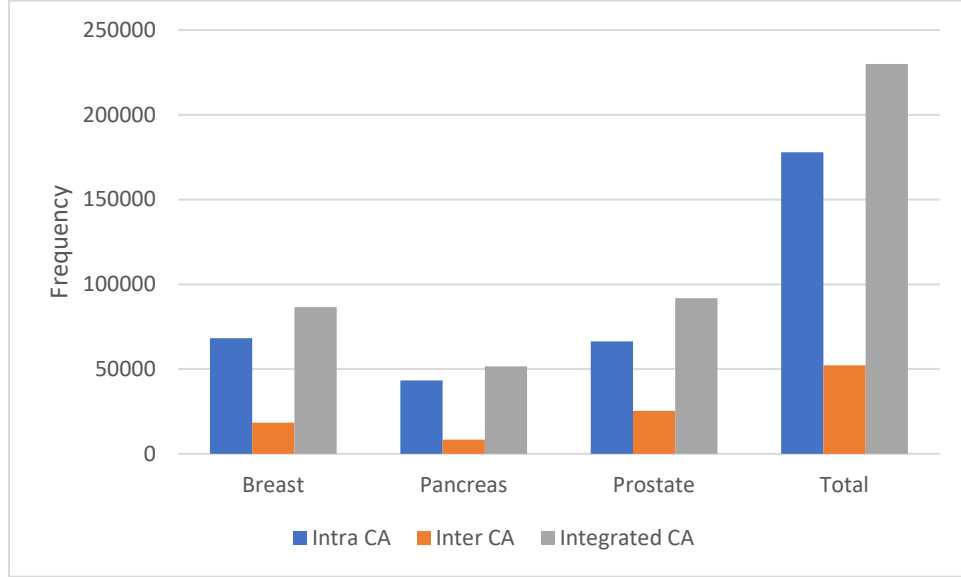

Figure S4. GAT architecture based on attention mechanism that indicates the importance of node  $j$ 's feature to node  $i$ ,  $e_{ij} = a(\mathbf{W}\vec{h}_i, \mathbf{W}\vec{h}_j)$  where  $e_{ij}$  is the attention coefficients,  $\mathbf{W}$  is a weight matrix, and  $h_i$ ,  $h_j$  are node features. The attention mechanism  $\alpha$  is a single-layer feedforward neural network parameterized by a weight vector and applying the RELU nonlinearity.

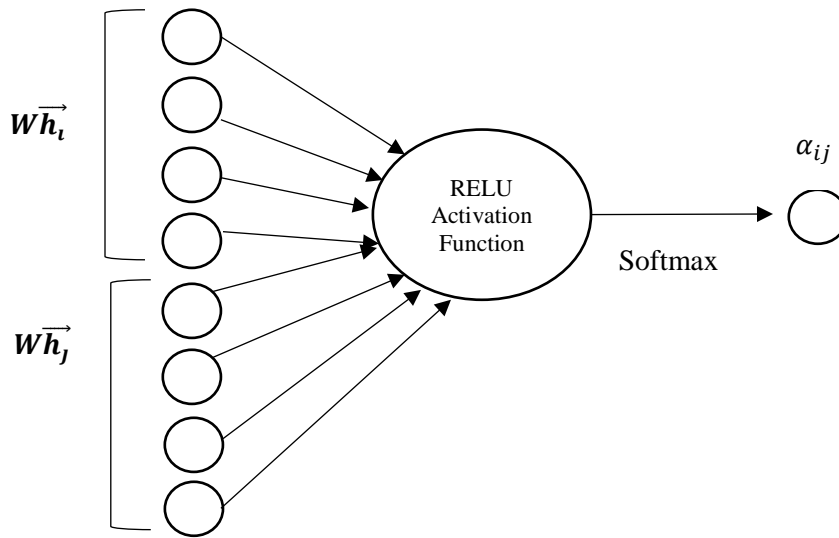

Table S1. Confusion matrix with actual values

|          | Breast | Pancreas | Prostate |
|----------|--------|----------|----------|
| Breast   | 29579  | 1044     | 17       |
| Pancreas | 2377   | 21120    | 2962     |
| Prostate | 1350   | 2388     | 29111    |
